# Supplementary material for: The Situation of Life-Sustaining Treatment One Year after Enforcement of the Act on Decisions on Life-Sustaining Treatment for Patients at the End-of-Life in Korea: Data of National Agency for Management of Life-Sustaining Treatment
Source: PubMed Central journal article supplement — Cancer Res Treat. 2021 Jun 2;53(4):897–907. doi: 10.4143/crt.2021.327 (PMC8524023; doi:10.4143/crt.2021.327), 2021-06-02
Supplement: crt-2021-327_S2Table.pdf [file crt-2021-327_S2Table.pdf]

**S2 Table.** Demographic characteristics of the patients in each form

|                                             | Form 1       | Form 9        | Form 11      | Form 12      | Form 13       |
|---------------------------------------------|--------------|---------------|--------------|--------------|---------------|
| No. of registration                         | 10,774       | 33,549        | 10,740       | 12,035       | 33,549        |
| Sex                                         |              |               |              |              |               |
| Male                                        | 6,822 (63.3) | 20,112 (59.9) | 6,081 (56.6) | 7,209 (59.9) | 20,112 (59.9) |
| Female                                      | 3,952 (36.7) | 13,437 (40.1) | 4,659 (43.4) | 4,826 (40.1) | 13,437 (40.1) |
| Age (yr)                                    | 67 (58-76)   | 73 (62-81)    | 77 (68-83)   | 74 (63-81)   | 73 (62-81)    |
| Verification of patient's intention-No. (%) |              |               |              |              |               |
| Form 1                                      |              |               |              |              | 10,749 (32.0) |
| Form 10                                     |              |               |              |              | 60 (0.2)      |
| Form 11                                     |              |               |              |              | 10,751 (32.0) |
| Form 12                                     |              |               |              |              | 11,989 (35.7) |
| Status of patient's disease                 |              |               |              |              |               |
| Terminal                                    | 7,135 (66.2) |               |              |              |               |
| End-of-Life                                 | 3,639 (33.8) |               |              |              |               |
| Plan for hospice service                    |              |               |              |              |               |
| Yes                                         | 8,117 (75.3) |               |              |              |               |
| No                                          | 2,060 (19.1) |               |              |              |               |
| Unmarked                                    | 597 (5.5)    |               |              |              |               |
| Patient's residence                         |              |               |              |              |               |
| Seoul                                       | 2,776 (25.8) |               |              |              |               |
| Busan                                       | 622 (5.8)    |               |              |              |               |
| Daegu                                       | 526 (4.9)    |               |              |              |               |

---

|                   |              |               |
|-------------------|--------------|---------------|
| Incheon           | 881 (8.2)    |               |
| Gwangju           | 153 (1.4)    |               |
| Daejeon           | 67 (0.6)     |               |
| Ulsan             | 459 (4.3)    |               |
| Sejong            | 32 (0.3)     |               |
| Gyeonggi-do       | 2,408 (22.4) |               |
| Gangwon-do        | 286 (2.7)    |               |
| Chungcheongbuk-do | 293 (2.7)    |               |
| Chungcheongnam-do | 302 (2.8)    |               |
| Jeollabuk-do      | 278 (2.6)    |               |
| Jeollanam-do      | 460 (4.3)    |               |
| Gyeongsangbuk-do  | 366 (3.4)    |               |
| Gyeongsangnam-do  | 657 (6.1)    |               |
| Jeju Island       | 208 (1.9)    |               |
| Hospital type     |              |               |
| Advanced general  | 6,232 (57.8) | 20,567 (61.3) |
| General           | 4,233 (39.3) | 11,753 (35.0) |
| Hospital          | 270 (2.5)    | 1,089 (3.2)   |
| Nursing hospital  | 18 (0.2)     | 112 (0.3)     |
| Clinic            | 21 (0.2)     | 28 (0.1)      |
| Hospital location |              |               |
| Seoul             | 4,106 (38.1) | 12,354 (36.8) |
| Busan             | 553 (5.1)    | 1,482 (4.4)   |

---

---

|                   |              |              |
|-------------------|--------------|--------------|
| Daegu             | 738 (6.8)    | 2,200 (6.6)  |
| Incheon           | 865 (8.0)    | 2,538 (7.6)  |
| Gwangju           | 10 (0.1)     | 610 (1.8)    |
| Daejeon           | 31 (0.3)     | 162 (0.5)    |
| Ulsan             | 502 (4.7)    | 970 (2.9)    |
| Gyeonggi-do       | 1,843 (17.1) | 5,398 (16.1) |
| Gangwon-do        | 208 (1.9)    | 762 (2.3)    |
| Chungcheongbuk-do | 209 (1.9)    | 884 (2.6)    |
| Chungcheongnam-do | 176 (1.6)    | 866 (2.6)    |
| Jeollabuk-do      | 200 (1.9)    | 1,699 (5.1)  |
| Jeollanam-do      | 507 (4.7)    | 1,048 (3.1)  |
| Gyeongsangbuk-do  | 6 (0.1)      | 163 (0.5)    |
| Gyeongsangnam-do  | 621 (5.8)    | 1,861 (5.5)  |
| Jeju Island       | 199 (1.8)    | 552 (1.6)    |

---

Values are presented as number (%) or median (IQR). IQR, interquartile range.
