# Supplementary material for: The Situation of Life-Sustaining Treatment One Year after Enforcement of the Act on Decisions on Life-Sustaining Treatment for Patients at the End-of-Life in Korea: Data of National Agency for Management of Life-Sustaining Treatment
Source: PubMed Central journal article supplement — Cancer Res Treat. 2021 Jun 2;53(4):897–907. doi: 10.4143/crt.2021.327 (PMC8524023; doi:10.4143/crt.2021.327), 2021-06-02
Supplement: crt-2021-327_S4Table.pdf [file crt-2021-327_S4Table.pdf]

**S4 Table.** Consistency of four items of LST decisions between form 1 and form 13

| Four items of LST decisions | From 13        |               |                                   |                  |              |                                   |                     |              |                                   |                   | p-value <sup>a)</sup> |
|-----------------------------|----------------|---------------|-----------------------------------|------------------|--------------|-----------------------------------|---------------------|--------------|-----------------------------------|-------------------|-----------------------|
|                             | Total patients |               |                                   | Cancer patients  |              |                                   | Non-cancer patients |              |                                   |                   |                       |
|                             | No. (%)        |               | Inconsistency rate<br>(95% CI, %) | No. (%)          |              | Inconsistency rate<br>(95% CI, %) | No. (%)             |              | Inconsistency rate<br>(95% CI, %) |                   |                       |
|                             | Marked         | Unmarked      |                                   | Marked           | Unmarked     |                                   | Marked              | Unmarked     |                                   |                   |                       |
| Form 1                      |                |               |                                   |                  |              |                                   |                     |              |                                   |                   |                       |
| CPR                         | Marked         | 10,731 (99.6) | 19 (0.2)                          | 0.19 (0.12-0.3)  | 9,354 (99.7) | 18 (0.2)                          | 0.2 (0.12-0.32)     | 1,377 (99.0) | 1 (0.1)                           | 0.14 (0.012-0.52) | 1                     |
|                             | Unmarked       | 2 (0)         | 22 (0.2)                          |                  | 1 (0)        | 10 (0.1)                          |                     | 1 (0.1)      | 12 (0.9)                          |                   |                       |
| Mechanical ventilation      | Marked         | 10,654 (98.9) | 42 (0.4)                          | 0.42 (0.3-0.56)  | 9,296 (99.1) | 37 (0.4)                          | 0.42 (0.3-0.57)     | 1,358 (97.6) | 5 (0.4)                           | 0.43 (0.16-0.94)  | 0.8258                |
|                             | Unmarked       | 3 (0)         | 75 (0.7)                          |                  | 2 (0)        | 48 (0.5)                          |                     | 1 (0.1)      | 27 (1.9)                          |                   |                       |
| Hemodialysis                | Marked         | 10,029 (93.1) | 75 (0.7)                          | 0.85 (0.69-1.05) | 8,887 (94.7) | 61 (0.7)                          | 0.82 (0.65-1.02)    | 1,142 (82.1) | 14 (1.0)                          | 1.08 (0.6-1.77)   | 0.3468                |
|                             | Unmarked       | 17 (0.2)      | 653 (6.1)                         |                  | 16 (0.2)     | 419 (4.5)                         |                     | 1 (0.1)      | 234 (16.8)                        |                   |                       |
| Anticancer drugs            | Marked         | 8,393 (77.9)  | 109 (1.0)                         | 1.53 (1.31-1.78) | 7,579 (80.8) | 90 (1.0)                          | 1.5 (1.27-1.77)     | 814 (58.5)   | 19 (1.4)                          | 1.73 (1.11-2.56)  | 0.5578                |
|                             | Unmarked       | 56 (0.5)      | 2,216 (20.6)                      |                  | 51 (0.5)     | 1,663 (17.7)                      |                     | 5 (0.4)      | 553 (39.8)                        |                   |                       |

CRP, cardiopulmonary resuscitation; LST, life-sustaining treatment. <sup>a)</sup>p-value between cancer and non-cancer patients.
